# Supplementary material
Source: MDPI journal article supplement (https://www.mdpi.com/2073-4352/13/11/1607)
Supplement: s1 [file s1]

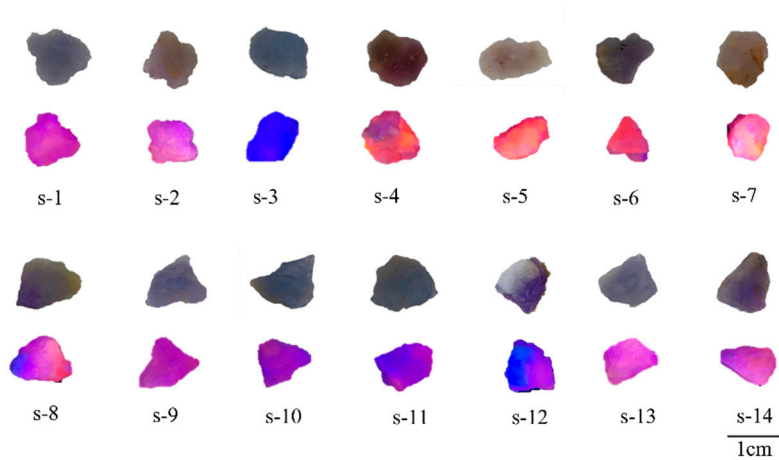

**Figure. S1 Irradiation of hackmanite samples under 365 nm UV fluorescent lamp**

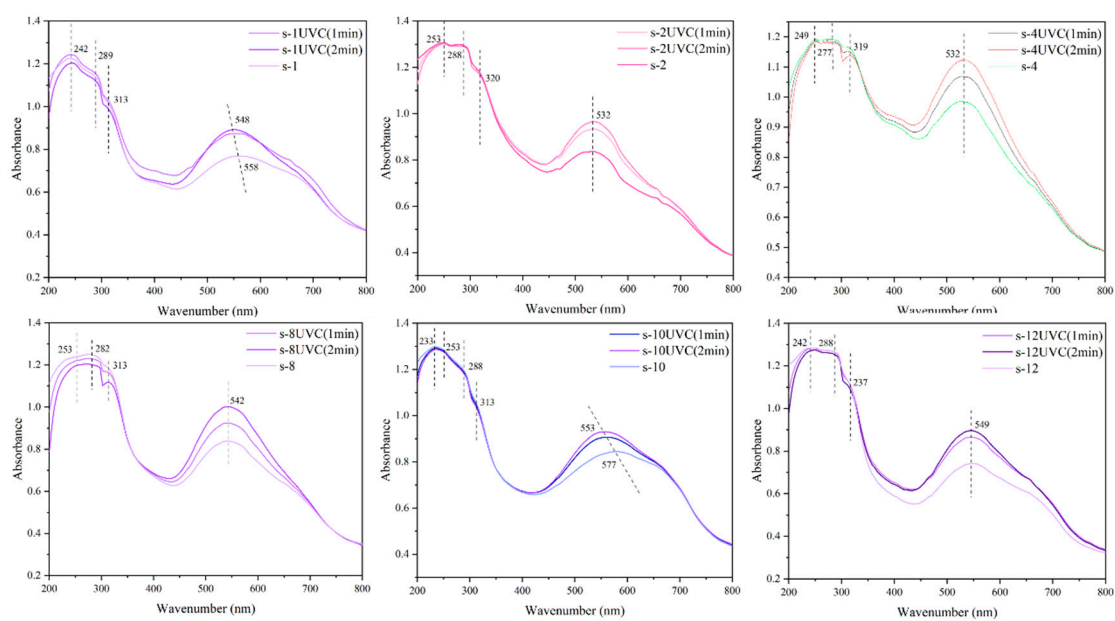

**Figure. S2 UV-Vis absorption spectra of hackmanite samples before and after exposure to 254 nm ultraviolet light.**

**Table. S1 Basic gemological property parameters of hackmanite samples.**

| sample              | s-1                             | s-2                             | s-3                                                 | s-4                                                     | s-5                                                     |
|---------------------|---------------------------------|---------------------------------|-----------------------------------------------------|---------------------------------------------------------|---------------------------------------------------------|
| color               | Light purple                    | Pink purple                     | blue                                                | Dark purple                                             | white                                                   |
| Transparent         | translucency<br>- opaque        | translucency<br>- opaque        | translucency<br>- opaque                            | translucency<br>- opaque                                | translucency<br>- opaque                                |
| Refractive<br>index | 1.482                           | 1.485                           | 1.484                                               | 1.483                                                   | 1.483                                                   |
| Relative<br>density | 2.26                            | 2.32                            | 2.35                                                | 2.30                                                    | 2.36                                                    |
| UV<br>fluorescent   | long wave:<br>strong,<br>purple | long wave:<br>strong,<br>purple | long wave:<br>strong, blue<br><br>Short wave:<br>no | long wave:<br>strong<br>orange-red<br>Short wave:<br>no | long wave:<br>strong<br>orange-red<br>Short wave:<br>no |

**Table. S2 X-ray Fluorescence spectra analysis data of hackmanite samples (wt %).**

| <b>Elements</b>                    | <b>s-1</b> | <b>s-8</b> | <b>s-10</b> |
|------------------------------------|------------|------------|-------------|
| <b>Na<sub>2</sub>O</b>             | 38.131     | 45.190     | 21.753      |
| <b>SiO<sub>2</sub></b>             | 25.491     | 24.992     | 37.487      |
| <b>Al<sub>2</sub>O<sub>3</sub></b> | 23.316     | 23.185     | 31.088      |
| <b>Cl</b>                          | 6.360      | 5.554      | 8.085       |
| <b>CaO</b>                         | 5.839      | 0.339      | 0.647       |
| <b>K<sub>2</sub>O</b>              | 0.503      | 0.287      | 0.359       |
| <b>SO<sub>3</sub></b>              | 0.255      | 0.301      | 0.356       |
| <b>Fe<sub>2</sub>O<sub>3</sub></b> | 0.040      | 0.016      | 0           |
| <b>Ta<sub>2</sub>O<sub>5</sub></b> | 0.032      | 0          | 0           |
| <b>Br</b>                          | 0.021      | 0.012      | 0.020       |
| <b>SrO</b>                         | 0.005      | 0          | 0           |
| <b>CuO</b>                         | 0.004      | 0.003      | 0.014       |
| <b>Rb<sub>2</sub>O</b>             | 0.001      | 0.001      | 0.002       |
| <b>Ir<sub>2</sub>O<sub>3</sub></b> | 0          | 0.052      | 0.011       |
| <b>BaO</b>                         | 0          | 0.036      | 0           |
| <b>HfO<sub>2</sub></b>             | 0          | 0.014      | 0           |
| <b>OsO<sub>4</sub></b>             | 0          | 0.009      | 0.046       |
| <b>PtO<sub>2</sub></b>             | 0          | 0.009      | 0           |
| <b>As<sub>2</sub>O<sub>3</sub></b> | 0          | 0          | 0.042       |
| <b>Cr<sub>2</sub>O<sub>3</sub></b> | 0          | 0          | 0.038       |
| <b>Sc<sub>2</sub>O<sub>3</sub></b> | 0          | 0          | 0.021       |
| <b>TiO<sub>2</sub></b>             | 0          | 0          | 0.020       |
| <b>HgO</b>                         | 0          | 0          | 0.010       |
| <b>Total</b>                       | 99.998     | 100        | 99.999      |

Table S3 LA-ICP-MS data of hackmanite

|                                |     | s-1-1  | s-1-2  | s-1-3  | s-4-1  | s-4-2  | s-4-3  | s-8-1  | s-8-2  | s-8-3  | s-10-1 | s-10-2 | s-10-3 |
|--------------------------------|-----|--------|--------|--------|--------|--------|--------|--------|--------|--------|--------|--------|--------|
| Li                             | ppm | 139.01 | 154.29 | 160.06 | 93.31  | 106.39 | 113.45 | 124.57 | 125.80 | 89.61  | 94.48  | 104.02 | 102.94 |
| Be                             | ppm | 80.74  | 75.93  | 72.87  | 61.79  | 81.07  | 86.47  | 72.67  | 78.88  | 106.49 | 72.93  | 72.88  | 69.28  |
| B                              | ppm | 190.17 | 171.24 | 187.87 | 172.11 | 167.06 | 194.87 | 199.77 | 183.28 | 166.08 | 178.57 | 185.71 | 178.74 |
| Na <sub>2</sub> O              | wt% | 25.54  | 24.78  | 24.41  | 24.68  | 24.45  | 24.88  | 25.33  | 24.65  | 23.38  | 24.28  | 24.65  | 24.66  |
| MgO                            | wt% | 0.02   | 0.02   | 0.02   | 0.02   | 0.01   | 0.02   | 0.02   | 0.01   | 0.01   | 0.01   | 0.01   | 0.01   |
| Al <sub>2</sub> O <sub>3</sub> | wt% | 32.26  | 31.48  | 31.72  | 31.60  | 31.64  | 31.39  | 32.35  | 31.47  | 33.33  | 31.10  | 31.30  | 31.31  |
| SiO <sub>2</sub>               | wt% | 36.12  | 37.46  | 37.56  | 37.75  | 37.93  | 37.74  | 36.11  | 37.73  | 37.18  | 38.53  | 37.90  | 37.88  |
| P <sub>2</sub> O <sub>5</sub>  | wt% | 0.01   | 0.01   | 0.02   | 0.01   | 0.02   | 0.01   | 0.01   | 0.01   | 0.01   | 0.01   | 0.01   | 0.02   |
| K <sub>2</sub> O               | wt% | 0.17   | 0.39   | 0.37   | 0.14   | 0.11   | 0.11   | 0.28   | 0.27   | 0.25   | 0.21   | 0.22   | 0.22   |
| CaO                            | wt% | 0.08   | 0.09   | 0.10   | 0.03   | 0.04   | 0.03   | 0.13   | 0.07   | 0.05   | 0.07   | 0.13   | 0.12   |
| Sc                             | ppm | 1.97   | 0.61   | 0.32   | 0.47   | 0.27   | 0.78   | 0.50   | 1.57   | 0.08   | 0.57   | 1.76   | 0.86   |
| TiO <sub>2</sub>               | wt% | 0.00   | 0.00   | 0.00   | 0.00   | 0.00   | 0.00   | 0.00   | 0.00   | 0.00   | 0.00   | 0.00   | 0.00   |
| V                              | ppm | 0.01   | 1.48   | 0.00   | 9.33   | 4.16   | 0.00   | 0.00   | 3.61   | 5.96   | 4.10   | 0.00   | 3.42   |
| Cr                             | ppm | 6.01   | 0.00   | 0.00   | 20.45  | 21.69  | 0.00   | 0.00   | 12.85  | 15.79  | 17.11  | 2.67   | 14.52  |
| MnO                            | wt% | 0.00   | 0.00   | 0.00   | 0.00   | 0.00   | 0.00   | 0.00   | 0.00   | 0.00   | 0.00   | 0.00   | 0.00   |
| FeO                            | wt% | 0.00   | 0.00   | 0.01   | 0.00   | 0.00   | 0.00   | 0.00   | 0.00   | 0.01   | 0.00   | 0.01   | 0.00   |
| Co                             | ppm | 0.23   | 0.00   | 0.00   | 0.27   | 0.87   | 0.00   | 0.00   | 0.39   | 0.00   | 0.57   | 0.69   | 0.58   |
| Ni                             | ppm | 6.25   | 0.62   | 0.00   | 6.73   | 0.00   | 0.00   | 0.00   | 1.18   | 0.00   | 0.00   | 0.00   | 11.00  |
| Cu                             | ppm | 0.00   | 0.14   | 0.75   | 0.16   | 0.00   | 0.00   | 0.11   | 0.17   | 0.00   | 0.85   | 0.00   | 0.00   |
| Zn                             | ppm | 0.76   | 0.83   | 0.00   | 18.27  | 44.20  | 14.30  | 0.59   | 1.13   | 3.40   | 0.11   | 0.00   | 0.00   |
| Ga                             | ppm | 21.58  | 20.94  | 19.99  | 23.54  | 25.74  | 23.69  | 21.42  | 19.39  | 19.99  | 18.73  | 19.44  | 21.13  |
| Ge                             | ppm | 0.00   | 3.65   | 2.58   | 0.00   | 2.72   | 0.29   | 2.42   | 2.24   | 2.08   | 0.19   | 1.84   | 0.00   |
| Se                             | ppm | 178.56 | 0.00   | 121.31 | 0.00   | 76.93  | 209.73 | 0.00   | 50.24  | 0.00   | 165.73 | 0.00   | 37.71  |
| Rb                             | ppm | 0.85   | 3.07   | 2.56   | 0.48   | 0.11   | 0.33   | 2.65   | 1.77   | 1.13   | 0.72   | 1.56   | 1.99   |
| Sr                             | ppm | 0.01   | 0.18   | 0.08   | 1.39   | 0.33   | 0.07   | 0.25   | 0.14   | 0.04   | 0.10   | 0.00   | 0.10   |
| Y                              | ppm | 0.00   | 0.00   | 0.00   | 0.00   | 0.00   | 0.03   | 0.00   | 0.00   | 0.03   | 0.00   | 0.00   | 0.01   |
| Zr                             | ppm | 0.00   | 0.09   | 0.15   | 0.00   | 0.00   | 0.00   | 0.86   | 0.02   | 0.03   | 0.00   | 0.00   | 0.00   |
| Nb                             | ppm | 0.00   | 0.00   | 0.00   | 0.95   | 0.54   | 0.20   | 0.02   | 0.01   | 0.03   | 0.02   | 0.00   | 0.00   |
| Mo                             | ppm | 0.00   | 0.04   | 0.02   | 0.07   | 0.35   | 0.00   | 0.03   | 0.09   | 0.10   | 0.05   | 0.13   | 0.13   |
| Ag                             | ppm | 0.18   | 0.04   | 0.00   | 0.31   | 0.00   | 0.10   | 0.17   | 0.08   | 0.12   | 0.00   | 0.00   | 0.00   |
| Sn                             | ppm | 0.25   | 0.43   | 0.35   | 0.14   | 0.24   | 0.17   | 0.17   | 0.39   | 0.20   | 0.15   | 0.46   | 0.32   |
| Sb                             | ppm | 0.03   | 0.00   | 0.00   | 0.13   | 0.00   | 0.04   | 0.00   | 0.13   | 0.00   | 0.02   | 0.03   | 0.05   |
| Cs                             | ppm | 0.45   | 2.46   | 1.70   | 0.29   | 0.10   | 0.41   | 2.41   | 1.40   | 1.31   | 0.35   | 3.47   | 2.17   |
| Ba                             | ppm | 1.26   | 0.11   | 0.00   | 7.37   | 0.45   | 1.09   | 0.13   | 0.07   | 1.57   | 0.01   | 1.24   | 1.07   |
| La                             | ppm | 0.00   | 0.00   | 0.01   | 0.00   | 0.00   | 0.03   | 0.00   | 0.00   | 0.01   | 0.01   | 0.00   | 0.00   |
| Ce                             | ppm | 0.01   | 0.00   | 0.01   | 0.00   | 0.00   | 0.03   | 0.01   | 0.01   | 0.00   | 0.00   | 0.00   | 0.00   |
| Pr                             | ppm | 0.00   | 0.00   | 0.00   | 0.00   | 0.00   | 0.00   | 0.00   | 0.00   | 0.01   | 0.00   | 0.00   | 0.00   |
| Nd                             | ppm | 0.00   | 0.06   | 0.03   | 0.00   | 0.05   | 0.03   | 0.00   | 0.00   | 0.00   | 0.00   | 0.00   | 0.02   |
| Sm                             | ppm | 0.04   | 0.00   | 0.00   | 0.00   | 0.00   | 0.00   | 0.00   | 0.00   | 0.01   | 0.08   | 0.00   | 0.02   |
| Eu                             | ppm | 0.00   | 0.00   | 0.01   | 0.00   | 0.00   | 0.01   | 0.00   | 0.00   | 0.00   | 0.00   | 0.00   | 0.02   |
| Gd                             | ppm | 0.01   | 0.00   | 0.00   | 0.03   | 0.00   | 0.04   | 0.00   | 0.05   | 0.14   | 0.00   | 0.01   | 0.11   |
| Tb                             | ppm | 0.00   | 0.00   | 0.00   | 0.01   | 0.01   | 0.01   | 0.00   | 0.00   | 0.00   | 0.01   | 0.00   | 0.00   |

|    |     |      |      |      |      |      |      |      |      |      |      |      |      |
|----|-----|------|------|------|------|------|------|------|------|------|------|------|------|
| Dy | ppm | 0.02 | 0.00 | 0.00 | 0.00 | 0.00 | 0.02 | 0.00 | 0.01 | 0.00 | 0.00 | 0.02 | 0.00 |
| Ho | ppm | 0.00 | 0.01 | 0.01 | 0.01 | 0.00 | 0.00 | 0.00 | 0.00 | 0.00 | 0.01 | 0.01 | 0.00 |
| Er | ppm | 0.00 | 0.01 | 0.03 | 0.00 | 0.04 | 0.01 | 0.01 | 0.01 | 0.00 | 0.00 | 0.00 | 0.00 |
| Tm | ppm | 0.00 | 0.00 | 0.01 | 0.00 | 0.01 | 0.00 | 0.01 | 0.01 | 0.00 | 0.01 | 0.00 | 0.00 |
| Yb | ppm | 0.02 | 0.04 | 0.00 | 0.00 | 0.00 | 0.00 | 0.00 | 0.03 | 0.00 | 0.00 | 0.01 | 0.00 |
| Lu | ppm | 0.00 | 0.00 | 0.00 | 0.00 | 0.00 | 0.00 | 0.01 | 0.00 | 0.00 | 0.00 | 0.00 | 0.01 |
| Hf | ppm | 0.00 | 0.00 | 0.01 | 0.01 | 0.00 | 0.00 | 0.00 | 0.00 | 0.00 | 0.01 | 0.00 | 0.00 |
| Ta | ppm | 0.00 | 0.00 | 0.00 | 0.03 | 0.02 | 0.01 | 0.00 | 0.01 | 0.00 | 0.00 | 0.01 | 0.00 |
| W  | ppm | 0.23 | 0.10 | 0.15 | 3.17 | 1.30 | 1.66 | 0.10 | 0.19 | 0.09 | 0.16 | 0.08 | 0.08 |
| Tl | ppm | 0.00 | 0.02 | 0.01 | 0.18 | 0.01 | 0.01 | 0.02 | 0.03 | 0.00 | 0.03 | 0.02 | 0.05 |
| Bi | ppm | 0.02 | 0.00 | 0.01 | 0.05 | 0.00 | 0.05 | 0.01 | 0.01 | 0.00 | 0.01 | 0.01 | 0.00 |
| Pb | ppm | 0.03 | 0.02 | 0.02 | 2.41 | 0.48 | 1.04 | 0.00 | 0.03 | 0.08 | 0.04 | 0.05 | 0.00 |
| Th | ppm | 0.01 | 0.00 | 0.00 | 0.14 | 0.06 | 0.15 | 0.00 | 0.01 | 0.02 | 0.00 | 0.01 | 0.01 |
| U  | ppm | 0.04 | 0.01 | 0.00 | 0.03 | 0.01 | 0.24 | 0.02 | 0.01 | 0.03 | 0.01 | 0.00 | 0.01 |
